# Supplementary material for: MicroRNA Profiling of BRCA1/2 Mutation-Carrying and Non-Mutation-Carrying High-Grade Serous Carcinomas of Ovary
Source: PLoS One. 2009 Oct 2;4(10):e7314. doi: 10.1371/journal.pone.0007314 (PMC2749450; doi:10.1371/journal.pone.0007314)
Supplement: Table S1 — Dataset containing the expression values for 60 filtered human miRNA in ovarian surface serous tumor, normal fallopian tube and soft tissue tumor/normal muscle samples. (0.09 MB XLS) [file pone.0007314.s001.xls]

## Sheet: Sheet1
VOA-329		STT516a-leiomyosarcoma	mra123 STT516a-LMS miRNA||mra123
VOA-186		STT4612a-leiomyosarcoma	mra122 STT4612a-LMS miRNA||mra122
VOA-223		STT111-gastrointestinal stromal tumor	mra102 STT111-GIST miRNA||mra102
VOA-239		STT335a-gastrointestinal stromal tumor	mra121 STT335a-GIST miRNA||mra121
VOA-336		STT335b-gastrointestinal stromal tumor	mra108 STT335b-GIST miRNA||mra108
VOA-379		STT623-gastrointestinal stromal tumor	mra101 STT623-GIST miRNA||mra101
VOA-283		STT638a-synovial sarcoma	mra125 STT638a-SS miRNA||mra125
VOA-293		STT3217-synovial sarcoma	mra105 STT3217-SS miRNA||mra105
VOA-327		STT3705-synovial sarcoma	mra106 STT3705-SS miRNA||mra106
VOA-163		STT1739a-synovial sarcoma	mra124 STT1739a-SS miRNA||mra124
VOA-212		Normal skeletal muscle	mra104 skeletal muscle1 miRNA||mra104	miRNA||mra104
VOA-305		Normal skeletal muscle	mra113 skeletal muscle miRNA||mra113	miRNA||mra113
VOA-330		STT932-alveolar rhabdomyosarcoma	mra115 STT932-ARMS miRNA||mra115
VOA-161		STT1433-alveolar rhabdomyosarcoma	mra116 STT1433-ARMS miRNA||mra116
VOA-201		STT4728-embryonal rhabdomyosarcoma	mra117 STT4728-ERMS miRNA||mra117
VOA-217		STT110-alveolar rhabdomyosarcoma	mra118 STT110-ARMS miRNA||mra118
VOA-332		STT4813-pleomorphic rhabdomyosarcoma	mra119 STT4813-PRMS miRNA||mra119
VOA-344		STT4814-pleomorphic rhabdomyosarcoma	mra170 STT4814-PRMS miRNA||mra170
VOA-345		TB1311a-leiomyosarcoma	mra157b TB1311a-LMS miRNA||mra157b
VOA-363		TB5363-synovial sarcoma	mra159 TB5363-SS miRNA||mra159
VOA-384		TB2500-synovial sarcoma	mra160 TB2500-SS miRNA||mra160
VOA-388		TB5321-synovial sarcoma	mra161 TB5321-SS miRNA||mra161
VOA-172		TB40-gastrointestinal stromal tumor	mra162 TB40-GIST miRNA||mra162
VOA-195		TB1081-gastrointestinal stromal tumor	mra164 TB1081-GIST miRNA||mra164
VOA-236		TB265-gastrointestinal stromal tumor	mra165 TB265-GIST miRNA||mra165
VOA-366		TB1296gastrointestinal stromal tumor	mra166 TB1296GIST miRNA||mra166
VOA-372		STT4608c-leiomyosarcoma	mra167 STT4608c-LMS miRNA||mra167
VOA-240		STT-638c-synovial sarcoma	mra168 STT-638c-SS miRNA||mra168
VOA-254		STT3217c-synovial sarcoma	mra169 STT3217c-SS miRNA||mra169
VOA-280		Normal myometrium	mrc121 SM_ myometrium1_R-miRNA||mrc121
VOA-297		Normal myometrium	mrc122 SM_ myometrium_R-miRNA||mrc122
VOA-319		Normal small bowel muscularis	mrc123 SM_small bowel_R-miRNA||mrc123
VOA-273		Normal gastric muscularis	mrc124 SM_stomach_R-miRNA||mrc124
VOA-221		Normal myometrium	mrc184 SM_uterus_R-miRNA||mrc184
VOA-324
VOA-277
VOA-278
VOA-593
VOA-594
VOA-598

## Sheet: 4614
CLID	GWEIGHT	VOA-329	VOA-186	VOA-223	VOA-239	VOA-336	VOA-379	VOA-283	VOA-293	VOA-327	VOA-163	VOA-212	VOA-305	VOA-330	VOA-161	VOA-201	VOA-217	VOA-332	VOA-344	VOA-345	VOA-363	VOA-384	VOA-388	VOA-172	VOA-195	VOA-236	VOA-366	VOA-372	VOA-240	VOA-254	VOA-280	VOA-297	VOA-319	VOA-273	VOA-221	VOA-324	VOA-277	VOA-278	VOA-593	VOA-594	VOA-598	STT516a-leiomyosarcoma	STT4612a-leiomyosarcoma	STT111-gastrointestinal stromal tumor	STT335a-gastrointestinal stromal tumor	STT335b-gastrointestinal stromal tumor	STT623-gastrointestinal stromal tumor	STT638a-synovial sarcoma	STT3217-synovial sarcoma
hsa_let_7a	1	0.762	0.842	-0.178	0.022	-0.998	-0.558	-4.618	-0.808	0.502	-0.628	-0.288	0.022	-0.838	-0.678	-0.138	-0.308	-2.958	-0.408	-1.218	-0.948	-0.888	0.542	-0.518	-5.178	-1.208	-1.908	-0.298	-0.398	-0.618	-0.328	-0.028	0.602	-0.088	-0.248	0.052	0.632	0.322	0.582	0.252	-0.058	2.052	0.882	-0.318	2.752	1.642	1.472	2.002	-3.158
hsa_let_7b	1	0.329	0.799	-1.091	0.069	-1.901	-1.041	-4.961	-0.661	0.199	-0.521	-0.501	-1.261	-1.031	-0.861	-0.571	-0.551	-2.311	-0.801	-1.211	-1.351	-2.201	-0.781	-1.471	-4.481	-0.851	-2.251	-0.631	-0.941	-0.741	-0.541	-0.391	0.789	-0.071	-0.041	0.509		0.859	0.889	0.889	0.539	2.339	1.509	-0.311	3.079	2.599	1.439	2.499	-2.021
hsa_let_7c	1	0.546	0.736	-0.644	-0.084	-1.554	-0.904	-4.574	-0.604	0.356	-0.614	-0.294	-0.984	-0.854	-0.824	-0.454	-0.334	-2.674	-0.594	-1.124	-0.994	-1.354	-0.154	-1.404	-4.834	-0.984	-1.794	-0.364	-0.634	-0.684	-0.364	-0.304	0.676	-0.144	-0.574	0.216	0.526	0.626	0.686	0.846	0.246	2.456	1.446	-0.294	2.856	1.986	1.536	2.366	-2.624
hsa_let_7d	1	0.909	0.599	0.149	-0.231	-1.091	-0.521	-3.951	-0.591	0.389	-0.601	-0.531	-0.441	-0.831	-0.201	0.079	-0.131	-3.051	-0.381	-1.121	-0.481	-0.601	0.719	-1.051	-4.871	-1.411	-2.251	-0.081	-0.081	-0.241	0.039	0.079	0.609	-0.131	-0.521	-0.151	0.389	-0.121	0.259	0.109	-0.361	2.199	0.919	-0.571	2.869	1.909	1.559	2.259	-3.411
hsa_let_7f	1	0.922	1.042	0.542	0.192	-0.128	-0.358	-3.978	-0.378	0.732	-0.118	-0.568	-0.238	-0.788	0.012	0.192	-0.008	-3.088	0.282	-0.818	-0.138	0.062	1.422	-0.988	-4.058	-1.278	-2.158	-0.068	0.232	0.022	0.082	0.242	0.242	0.012	-0.418	-0.328	0.882	0.462	0.472	0.312	-0.158	2.052	0.282	-0.648		2.362	1.542	1.962	-4.128
hsa_miR_1	1	-0.203	-0.153	0.657	0.207	-1.003	-0.143	0.037	0.987	-1.093	-0.063	-0.093	-0.333	0.227	-0.503	0.567	-0.433	0.347	-0.233	-0.153	-0.373	0.457	0.107	-0.513	0.417	0.207	0.417	0.087	0.067	0.387	0.037	0.357	0.017	0.177	0.027	-0.633	-0.073	0.297	2.187	1.707	1.967	2.687	1.207	-1.693	-1.203	-2.993	-1.513	-0.433	-1.483
hsa_miR_106a	1	1.974	2.074	0.954	0.874	3.494	0.624	-1.836	0.024	1.314	0.354	2.074	2.104	0.984	0.944	1.174	0.614	-0.316	2.624	1.034	1.904	0.964	1.454	1.904	-2.676	1.144	2.914	0.204	0.914	1.364	2.384	0.644	0.944	1.324	2.234	1.154	1.634	2.054	-0.256	-0.586	-1.026	-0.046	-0.826	-1.226	-0.846	-1.466	-2.376	-1.926	-4.116
hsa_miR_106b	1	1.325	2.195	0.215	0.465	3.345	0.785	-1.825	-0.155	1.125	1.535	1.515	2.305	0.445	1.775	-0.025	0.905	0.035	3.065	1.335	1.705	1.735	1.005	1.755	-1.435	0.685	1.675	0.865	-0.155	1.035	0.565	0.535	0.425	0.595	1.035	0.885	-0.265	0.815	-0.665	-0.935	-0.675	-0.065	-0.305	-0.965		-1.465	-1.355	-0.945	-3.035
hsa_miR_10a	1	0.661	1.721	-0.439	0.771	0.731	-1.019	-2.899	-0.329	-0.619	0.571	1.381	2.171	-0.049	-0.499	1.111	1.211	0.001	1.271	-1.139	0.201	1.941	0.931	4.251	-3.389	-3.499	-2.759	0.111	1.261	0.631	-1.569	0.841	1.521	2.891	2.071	2.631	1.081	1.961	1.491	0.921	0.671	0.861	-0.739	-0.799	-0.549	-0.869	-0.389	0.161
hsa_miR_10b	1	-0.359	0.901	0.691	-0.089	-2.239	0.911	-3.629	-1.799	1.381	0.241	-0.649	-0.229	1.671	0.201	-0.779	1.151	-0.989	1.821	1.121	2.181	0.111	1.931	2.091	-3.599	-0.329	-0.069	-0.189	0.591	-0.289	2.251	-0.789	-1.589	-0.409	1.591	2.081	0.931	0.531	0.921	0.401	0.331	1.181	2.641	-2.399	0.581	0.331	-2.889	0.091
hsa_miR_122a	1	0.128	-0.072	0.548	0.488	0.578	0.638	1.318	0.568	0.038	0.508	0.188	0.348	0.158	0.548	0.528	0.458	0.968	0.408	0.568	0.558	0.068	0.278	0.248	1.448	0.318	0.688	0.638	0.548	0.658	-0.232	0.438	0.128	0.568	0.268	0.148	0.218	0.528	0.558	0.568	0.708	0.408	0.748	-0.142	0.268	-1.002	-0.102	0.678	1.338
hsa_miR_124a	1	0.703	0.193	1.173	0.573	1.003	0.593	2.263	1.753	0.943	0.883	1.183	0.673	0.923	1.003	1.153	1.343	1.593	1.143	1.443	1.273	1.143	1.173	0.783	1.293	0.713	1.373	0.803	1.163	1.323	0.783	1.003	0.483	1.273	0.153	-0.187	0.823	-0.147	1.013	0.963	0.863	-1.427	-2.097	-3.497	-1.197	-3.297		-0.927
hsa_miR_125a	1	0.184	1.224	-1.216	-0.226	-2.136	-0.866	-2.766	-1.026	0.434	-0.416	-0.596	-0.406	-1.166	-0.456	-0.986	0.544	-2.486	-0.226	-0.156	-0.046	-1.596	-0.286	1.074	-3.906	-0.016	-1.446	-0.846	-0.756	0.094	0.314	0.314	0.224	1.344	0.984	-0.736	0.394	0.904	1.114	0.574	0.424	-0.136	0.134	0.974	0.324	2.484	1.564	0.504	-2.606
hsa_miR_125b	1	0.113	0.133	-2.367	-1.547	-2.097	-0.377	-3.807	-2.067	-0.307	-1.317	0.073	-1.337	-1.327	-2.307	-1.657	-0.457	-2.167	-0.317	-2.237	-1.307	-2.357	-0.037	1.253	-4.797	-0.157	-0.127	-1.167	-1.127	-0.777	-0.487	-0.087	0.153	-0.547	0.483	0.043	-0.407	-0.067	1.353	0.753	0.703	0.313	1.353	1.623	1.873	2.193	0.513	0.873	1.043
hsa_miR_126	1	0.224	2.044	-0.936	-0.226	0.474	-0.306	-2.666	1.324	0.534	0.774	1.754	1.304	-0.386	-0.156	0.794	-0.116	-2.536	2.204	0.084	1.144	0.454	0.824	1.714	-3.876	-0.736	-1.276	0.384	0.784	1.114	-0.716	1.084	0.954	0.134	-0.216	0.614	-0.456	0.214	2.094	1.564	2.114	0.354	1.784	-1.346	-0.426	-0.946	-1.756	-1.856
hsa_miR_133a	1	-0.539	-0.489	-0.439	-0.639	-0.429	-0.219	1.041	0.571	-0.909	-0.109	-0.009	-0.579	-0.389	-0.369	0.751	-0.079	0.451	-0.279	0.101	-0.279	0.031	-0.289	-0.539	0.111	0.191	-0.019	-0.299		-0.039	0.991	-0.159	-0.209	-0.029	-0.099	-1.429	0.011	-1.329	1.371	1.291	0.861	2.101	1.331
hsa_miR_133b	1	-0.39	-0.09	-0.37	-0.42	-0.23	-0.34	1.02	0.67	-0.16	-0.32	-0.09	-0.29	-0.04	0.17	0.6	-0.07	0.47	-0.28	0.13	-0.38	0.68	0.14	0.08	0.11	-0.13	0.06	-0.17	-0.05	0.4	0	0.18	0.15	0.26	-0.64	-1.49	-0.03	0.02	1.57	1.52	1.38	2.09	1.58	-1.7	-1.99	-3.4	-2.79	-1.27
hsa_miR_141	1	2.759	4.149	1.489	2.509	4.229	0.969	-0.941	-0.051	3.239	1.969	2.819	4.079	2.459	2.319	1.689	2.849	0.329	3.779	1.989	2.649	2.729	2.699	2.239	-0.651	2.349	2.399	1.609	1.259	0.919	2.109	1.719	1.369	1.969	3.309	3.599	3.089	2.339	0.189	0.569	-0.001	-2.831	-0.901	-3.551	-2.561	-3.861	-3.441	-1.761	-2.171
hsa_miR_143	1	-1.348	0.872	-3.048	-1.608	-0.858	-0.428	-3.218	0.102	-2.278	-0.538	-0.258	-1.678	-1.228	-2.558	-0.368	-0.568	-2.818	-0.568	-1.728	-1.098	-1.378	-1.998	-0.038	-4.508	-1.338	-1.538	-1.038	-0.648	-0.638	-2.458	-0.778	-0.418	-0.988	-1.498	-1.448	-2.848	-0.768	1.902	1.272	1.362	3.682	3.162	3.892	4.142	3.602	3.582	-3.128
hsa_miR_145	1	-2.151	0.109	-3.511	-1.271	-3.081	-1.021	-2.571	-0.541	-3.121	-1.351	-1.461	-2.801	-2.121	-3.021	-0.551	-0.751	-3.641	-2.231	-2.411	-2.371	-3.291	-2.821	-1.121	-3.571	-1.611	-2.961	-0.871	-1.261	-0.141	-2.641	-0.761	-0.531	-0.861	-1.861	-1.911	-2.571	-1.641	2.239	1.649	1.499	4.079	3.439	3.449	5.129	4.089	4.099	-1.631	-1.811
hsa_miR_146b	1	2.301	1.511	1.521	1.371	-1.519	0.801	-0.689	0.971	2.381	3.121	2.501	3.011	0.611	1.881	1.811	1.871	0.241	3.361	1.731	2.211	1.661	1.701	3.641	-0.359	0.701	2.441	1.641	2.021	1.901	2.461	1.611	1.991	1.681	1.771	2.431	1.591	2.451	-0.239	-0.299	1.011	-2.679	-0.839	-2.189	-0.289	-0.599	-2.769	-2.009
hsa_miR_148a	1	0.058	3.248	1.148	2.238	-0.162	0.158	-1.682	0.988	2.008	0.868	2.408	3.478	0.288	0.638	0.828	1.168	-0.102	1.798	1.578	1.508	1.438	2.358	2.208	-2.962	0.018	-0.952	0.878	-1.032	0.678	0.808	1.508	1.388	-0.112	2.008	1.888	0.748	0.548	1.338	1.288	0.498	-2.962	-0.352	-0.322	-1.232	-1.982		-1.282
hsa_miR_16	1	0.9	2.09	0.38	0.77	0.89	-0.04	-2.71	0.39	2.17	0.6	1.58	1.64	-0.61	0.78	0.57	0.27	-1.71	2.63	0.9	1.47	1.23	1	0.29	-5.04	-0.97	-0.72	1.19	0.27	0.68	1.31	0.22	1.1	0.19	0.86	0.83	0.68	1.27	-0.54	-0.86	-0.75	2.64	0.45	-0.15		1.92	-0.98	-0.58	-5.27
hsa_miR_17_5p	1	2.06	2.13	0.99	0.82	3.59	0.71	-2.05	-0.07	1.35	0.37	2.12	2.05	1.01	0.96	1.01	0.48	-0.3	2.66	0.95	1.95	0.87	1.3	2.01	-2.54	1.21	2.87	0.11	0.66	1.25	2.19	0.38	0.88	1.23	2.38	1.03	1.5	2.12	-0.3	-0.74	-0.91	-0.17	-0.99	-1.12		-1.43	-2.51	-2.09
hsa_miR_182	1	0.516	2.356	0.756	-0.114	3.386	0.406	-0.154	-0.264	0.076	-0.534	1.186	3.556	1.136	2.026	1.156	0.226	0.276	-0.004	0.496	0.146	1.556	-0.084	4.246	0.086	0.266	1.136	1.666	0.516	-0.024	0.796	2.016	0.806	0.686	0.606	2.756	-0.394	0.566	-0.544	-0.354	-0.574	-1.234	-0.784	-0.894	-1.454	-2.504	-1.824	-0.104	-1.334
hsa_miR_194	1	1.076	1.766	0.116	0.306	1.166	2.006	0.926	0.516	2.046	1.076	1.356	0.076	0.246	0.176	0.726	1.966	0.426	2.206	0.396	1.276	0.846	0.716	0.176	0.736	0.096	0.506	0.316	0.166	0.536	0.116	0.246	-0.024	0.346	0.376	1.256	0.376	0.586	0.486	0.316	0.476	-0.104	-0.244	-1.294	-0.084	-1.144	-1.474	-0.324	-1.364
hsa_miR_195	1	0.235	1.435	0.145	-0.035	-0.715	0.845	-3.255	-0.115	-0.025	-0.225	0.745	-0.575	-1.655	-1.155	0.115	0.315	-1.335	1.175	-0.895	-0.475	-1.035	0.725	-0.895	-3.465	-1.195	-1.555	-1.135	-0.855	-0.475	-1.005	-0.035	0.925	-0.045	-0.525	-0.125	-0.735	1.775	1.755	1.465	1.415	3.015	1.445	0.605		1.275	-1.435	0.115
hsa_miR_196b	1	-1.512	1.558	-0.432	-0.862	-0.292	-1.852	-0.442	-0.722	1.538	-1.472	-1.062	-1.262	-1.302	-0.732	-0.072	-0.492	-0.932	-1.322	-0.982	-1.402	-0.412	-1.672	-0.992	-0.972	-0.892	-1.282	0.758	-1.332	-1.532	-1.002	-0.642	-1.432	-1.702	-0.162	-2.292	-0.762	-1.742	-1.002	-1.182	-0.932	0.588	2.208			2.318	0.708	0.938
hsa_miR_199a	1	-0.559	1.121	-2.709	-0.719	-2.119	-0.469	-4.479	-0.679	-3.099	-0.179	-0.949	-3.019	-1.799	-1.609	0.101	0.121	-2.869	-2.639	-1.139	-0.769	-0.569	-1.719	0.191	-4.429	-0.529	-2.049	0.121	0.591	-0.749	-0.589	0.911	0.761	0.671	-0.799	-1.159	-1.859	-1.169	-0.699	-1.049	-1.019	1.281	1.671	1.451	2.621	1.181	1.401	0.921	1.201
hsa_miR_199a_AS	1	-0.194	2.486	-2.374	-0.614	-0.884	0.676	-3.444	0.126	-2.664	0.796	0.186	-1.514	-1.864	-1.194	0.646	0.866	-3.454	-1.404	-0.564	0.166	1.286	-0.984	0.646	-4.604	-0.594	-1.314	0.926	1.066	-0.364	-0.474	0.926	1.426	0.896	-0.044	-0.454	-1.604	-0.104	-0.284	-0.634	-0.184	1.046	0.486	0.756	2.226	0.486	0.266	0.516	-1.644
hsa_miR_200a	1	2.276	3.606	0.466	2.246	4.386	1.186	-2.614	-0.934	2.406	0.886	1.356	1.606	2.366	1.396	-0.214	1.556	-2.484	1.406	1.096	1.796	1.376	0.026	1.986	-2.624	-0.264	1.466	1.326	0.546	0.266	0.236	0.016	0.746	1.256	1.426	1.666	0.486	1.936	0.476	0.306	-0.164	-0.894	-0.454	-4.344		-1.104	-1.724	-0.264
hsa_miR_200b	1	3.481	4.941	2.281	4.901	6.071	3.571	-1.079	0.101	4.321	2.071	3.001	3.601	3.341	2.951	2.431	4.061	-1.589	2.911	3.611	3.851	2.741	2.031	3.551	-0.919	2.151	2.891	3.161	2.831	2.881	2.261	1.781	2.421	3.931	4.001	2.111	3.221	4.471	1.761	1.631	1.151	-3.499	-2.059	-5.159	0.661	-5.189		-0.579
hsa_miR_200c	1	4.034	4.214	2.564	4.004	4.174	2.414	0.114	1.714	3.634	2.924	3.534	4.694	3.404	3.524	2.754	3.804	1.114	4.074	2.954	3.204	3.304	3.754	3.464	0.054	3.754	3.084	2.954	2.184	3.054	4.414	3.344	2.454	3.584	3.684	3.464	3.664	4.134	1.044	1.234	0.774	-3.646	-1.566	-4.496	-3.736	-5.016	-5.116	0.024
hsa_miR_203	1	2.889	3.259	3.159	0.589	1.139	2.559	-1.131	1.779	3.039	-0.801	1.789	2.339	2.669	1.569	-0.141	2.849	-2.081	1.559	0.769	4.329	4.929	1.899	-0.811	-1.631	-2.381	0.449	2.929	3.289	0.819	1.719	-1.021	3.319	2.159	-0.671	2.929	-0.201	1.409	-0.051	-0.401	-0.741	-2.821	-2.331					3.619
hsa_miR_205	1	2.818	-0.962	3.778	3.638	-1.332	3.188	1.208	1.258	5.638	-0.462	-0.182	4.958	0.228	2.938	-1.122	3.848	-0.612	-0.232	0.768	0.078	3.058	2.828	3.868	0.878	-0.302	1.848	1.868	1.458	1.118	-1.252	-0.612	2.018	1.388	1.358	2.788	0.288	0.258	-0.412	-0.412	-0.792	-1.882	-1.512	-2.392	-1.952	-2.042		0.128
hsa_miR_206	1	0.947	0.847	1.347	1.237	1.357	0.967	2.107	1.607	1.017	1.367	0.977	0.797	1.047	1.327	0.727	1.467	1.807	1.137	1.507	1.267	0.937	0.647	0.897	2.267	1.317	1.377	0.717	1.117	1.647	0.577	1.167	0.797	1.477	0.897	0.567	1.287	1.317	1.637	1.607	1.777	-1.973	-2.963	-2.323	-2.413	-3.563	-2.233	-1.733	-1.483
hsa_miR_20a	1	2.023	2.523	1.063	0.933	3.623	0.733	-2.447	0.173	1.693	0.593	2.543	2.383	0.983	0.923	0.943	0.563	-0.837	3.013	1.203	1.983	1.333	1.383	2.163	-2.527	1.013	2.893	0.173	0.783	1.323	1.983	0.443	1.083	1.233	2.453	1.523	1.823	2.473	-0.007	-0.297	-0.677	-0.097	-1.387	-1.457		-1.647	-3.627	-2.397
hsa_miR_20b	1	2.002	1.732	1.082	0.642	3.392	1.002	-1.978	0.152	1.302	0.332	2.312	2.242	0.832	1.022	0.792	0.402	-1.038	2.602	1.182	1.982	1.102	1.892	1.842	-3.128	0.592	2.772	0.352	0.922	1.502	1.832	0.842	0.912	1.032	1.352	1.272	1.312	1.802	-0.358	-0.648	-0.968	0.132	-1.278	-0.988		-1.098	-3.768	-2.548
hsa_miR_21	1	0.509	1.809	0.719	1.309	-0.591	0.919	-3.401	2.309	2.349	1.849	2.329	2.179	-1.221	1.289	2.839	2.559	-1.141	2.169	1.709	2.339	2.309	2.769	1.469	-4.121	-0.371	-2.031	2.679	2.329	1.969	0.819	1.719	2.349	1.739	1.319	1.849	0.619	1.379	-0.961	-1.301	0.659	1.629	-0.081	-2.931		-1.911	-3.441	-0.411	-5.421
hsa_miR_214	1	-0.358	1.172	-2.838	-1.228	-2.758	-0.538	-2.978	-0.778	-2.568	-0.078	-1.408	-2.648	-2.248	-1.558	-0.718	-0.618	-2.948	-3.238	-1.508	-1.168	-1.808	-2.898	0.042	-3.238	-0.338	-2.358	-0.208	-0.268	-0.468	-0.438	0.422	1.312	0.722	-0.978	-1.878	-1.808	-1.078	-0.318	-0.738	-0.298	1.252	1.342	1.452	2.262	2.032	0.562	2.432	3.082
hsa_miR_221	1	0.662	1.352	0.452	0.382	-0.128	1.292	-1.358	-0.078	0.842	1.582	0.572	1.962	0.612	0.442	0.892	1.512	-1.348	1.482	0.182	1.752	1.632	1.732	2.762	-3.428	-0.128	-0.218	0.752	1.502	0.792	0.312	0.042	1.452	0.482	1.852	1.222	0.962	1.032	-0.108	-0.658	-0.028	2.492	0.822	-2.758	-0.598	-0.698	-4.198	-2.168
hsa_miR_222	1	0.557	1.077	0.377	0.247	-0.463	0.697	-0.973	-0.133	0.777	1.427	0.307	1.377	0.217	0.477	0.617	1.307	-1.363	1.077	0.357	1.127	0.667	1.247	2.557	-2.663	0.017	-0.763	0.627	0.947	0.757	0.527	0.277	1.257	0.347	1.897	0.997	0.477	0.727	0.357	-0.213	0.327	2.967	1.517	-1.963	-0.173	-0.833	-3.363	-2.203
hsa_miR_23a	1	1.057	1.837	-0.433	-0.133	-0.363	-0.343	-3.893	0.157	1.037	0.067	0.087	0.387	-0.493	0.427	1.977	1.757	-0.883	2.377	0.207	0.787	0.767	0.577	0.897	-4.443	-0.473	-0.353	0.347	-0.223	0.927	-0.063	-0.023	1.617	0.627	0.917	-0.323	0.367	0.617	0.287	-0.373	-0.103	1.567	-0.413	-0.843	2.687	2.217	-0.223	0.967	-5.053
hsa_miR_23b	1	1.135	2.085	-0.445	-0.245	-0.675	-0.345	-4.165	0.145	0.925	0.095	0.025	0.225	-0.695	0.525	1.455	1.435	-0.965	2.455	0.075	0.985	0.595	0.745	1.165	-4.675	-0.575	-0.335	0.515	-0.535	0.585	-0.245	-0.045	1.485	0.495	0.785	-0.445	0.185	0.335	0.365	-0.255	-0.035	1.735	-0.045	-1.165		1.775	-0.275	1.215
hsa_miR_24	1	0.892	1.412	-0.198	-0.828	-0.868	-0.358	-3.238	-0.238	0.622	-0.348	-0.278	0.342	-0.498	0.182	1.162	0.732	-0.468	1.572	-0.308	1.212	1.062	0.962	0.362	-4.418	-0.758	-0.158	0.312	-0.418	-0.128	-0.298	-0.438	0.872	-0.198	0.332	-0.418	-0.218	0.102	-0.168	-0.558	-0.328	1.602	-0.188	-0.318	1.772	1.992	-0.078	1.452
hsa_miR_26a	1	0.639	1.569	-0.471	0.439	0.049	0.909	-3.761	-0.711	1.639	0.199	0.829	1.229	-1.271	-0.251	0.179	1.019	-1.771	1.079	0.179	-0.141	0.609	0.009	1.749	-5.181	-0.751	0.039	0.449	-0.341	-0.461	0.249	0.079	0.649	0.299	1.649	0.809	1.239	1.099	1.399	0.729	0.549	0.869	-0.351	0.029	1.299	0.609	-0.061	0.949	-4.411
hsa_miR_27b	1	1.21	2.22	-0.3	-0.27	-0.96	0	-3.84	0.11	1	0.16	0.59	0.46	-0.87	0.7	1.26	1.02	-0.67	2.69	0.41	1.49	0.76	0.77	1.38	-4.83	-0.08	0.27	0.28	-0.67	0.22	-0.6	-0.14	1.67	0.49	1.54	-0.59	0.82	1.18	0.98	0.3	0.3	1.47	-0.44	-1.41		1.1	-0.65	0.54
hsa_miR_29a	1	1.414	1.524	1.164	0.954	0.324	1.844	-3.256	-0.046	2.424	0.724	1.354	1.824	-0.436	2.084	0.594	1.294	-0.266	2.264	0.604	1.204	2.424	1.864	0.524	-3.356	-0.886	-1.916	1.194	0.224	-0.326	0.574	0.174	0.554	0.904	2.374	1.894	1.924	2.434	1.624	1.144	1.014	0.954	-0.416	0.414		1.794	1.034	-0.726	-5.536
hsa_miR_29b	1	1.597	-0.013	0.947	0.337	0.177	1.677	-2.123	-0.273	1.817	0.317	1.317	2.287	0.327	1.157	0.597	0.927	0.247	1.717	0.507	1.117	2.397	2.787	-0.133	-2.293	-0.073	-2.023	0.977	0.687	-0.823	0.557	0.147	0.217	0.697	0.467	1.537	1.597	1.367	0.867	0.497	0.057	1.027	0.287	2.267	2.497	2.487	1.837	-3.183
hsa_miR_29c	1	0.449	0.619	0.169	0.139	-1.671	-0.191	-3.371	-0.751	0.709	0.109	-0.771	0.089	-1.451	-0.191	-1.011	-0.221	-1.971	1.919	0.409	-0.301	-1.021	0.819	-0.401	-3.201	-1.531	-2.861	-0.751	-1.011	-0.761	-0.891	-0.541	-0.311	-0.131	0.339	1.009	0.809	0.669	1.999	1.459	0.909	2.799	0.859	2.899		4.599	3.069	0.149	-3.121
hsa_miR_31	1	1.943	2.383	0.883	0.633	2.463	-0.267	-0.587	0.833	0.573	0.733	2.553	2.593	0.973	0.273	1.163	-0.157	1.223	-0.707	1.043	2.473	2.953	0.763	-0.227	-1.297	-0.527	-1.737	3.863	4.323	0.363	-1.317	1.533	2.213	-1.617	3.593	-0.407	-0.197	2.983	0.273	1.173	-0.377	2.183	-1.747	-1.707	-1.267	-1.717	-2.447	0.183
hsa_miR_368	1	-0.231	1.539	-1.271	0.359	-0.641	0.689	-0.101	0.799	-0.481	0.419	0.409	-0.941	0.789	-0.701	0.069	1.049	-0.571	-0.181	0.399	0.149	0.539	-0.561	0.659	-0.911	-0.531	0.459	0.589	0.299	0.429	-1.301	0.259	2.029	-0.471	-0.071	0.849	0.009	0.579	0.179	0.359	0.169	-2.171	-3.121	-4.001				1.969	-1.371
hsa_miR_376a	1	0.027	1.007	-0.613	0.697	-0.763	-0.463	0.367	0.497	-0.223	0.327	-0.553	-1.093	0.447	-0.433	0.087	1.377	-0.643	-0.253	0.117	-0.033	0.107	-0.303	0.177	0.127	0.067	0.347	0.157	0.387	0.727	-1.343	0.307	1.397	0.057	0.697	0.597	0.717	0.857	0.297	0.387	0.197	-2.503	-1.103		-3.223			1.947
hsa_miR_429	1	1.646	3.666	0.706	3.046	4.606	0.126	-0.864	-0.194	2.796	1.266	1.196	1.626	1.226	1.466	0.096	1.386	-0.114	1.026	1.846	2.026	0.006	0.036	2.176	0.406	0.946	0.376	1.776	0.626	1.086	-0.374	0.016	0.306	0.966	1.256	0.376	0.506	2.106	0.656	0.546	0.526	-0.654	-0.684	-2.134		-3.814	-2.834	-0.124	-0.754
hsa_miR_449	1	0.11	-0.58	-0.81	-0.14	4.75	3.34	-0.27	-0.47	0.72	-0.25	0.02	4.37	2.13	-0.31	-1.02	-0.01	-0.24	0.02	-0.41	-0.12	-0.48	2.29	-0.61	0.61	1.93	4.41	-0.83	-1.22	-0.81	-1.74	-0.99	-0.56	-0.85	2.19	4.01	2.39	5.01	-0.34	0.04	0.01	-0.58	-0.93	-1.53		-2.4	-1.7	-0.34	-0.96
hsa_miR_451	1	-1.831	-0.351	-0.531	-1.351	2.889	0.109	-1.341	0.809	0.249	1.989	4.039	-0.231	-1.271	-0.281	0.389	-0.441	-1.761	1.619	1.909	1.619	0.279	-0.701	-1.341	-1.831	-2.191	-1.171	0.469	0.049	0.559	-1.021	3.339	2.249	-1.431	-0.311	1.019	-1.461	1.809	0.939	1.509	2.459	-0.481	0.669	0.349		-0.701	-0.041
hsa_miR_497	1	0.439	0.889	0.109	-0.681	0.359	1.159	-2.241	-0.531	-0.851	-0.781	1.289	0.099	-0.201	-2.211	-0.161	-0.031	1.169	1.849	-1.441	-0.121	-0.221	0.829	-0.921	-3.131	0.019	0.089	-1.691	-1.151	-1.021	-1.501	-0.171	0.369	-0.681	-0.241	-0.181	-1.731	1.309	0.309	0.079	0.109	2.199	1.969	2.289	0.809	0.459		-0.821
hsa_miR_517a	1	-1.27	-2.23	-1	-2.06	-2.12	-2.73	-0.14	-0.88	-1.21	-1.66	-1.81	-2.02	-1.43	-1.73	-1.36	-0.93	-1.25	-1.96	-1.56	-1.55	-1.46	-1.41	-1.32	-1.56	-1.26	-2.19	-1.98	-1.69	-1.61	-1.64	-1.86	-1.78	-1.28	-2.16	-2.59	-1.38	-2.32	-1.54	-1.52	-1.6	3.01	2.02	1.46	2.56			1.99
hsa_miR_517b	1	-1.61	-2.5	-1.81	-2.2	-2.02	-2.64	-0.47	-1.23	-0.68	-2.33	-2	-2.09	-1.73	-1.59	-1.46	-1.71	-1.16	-1.9	-1.6	-1.75	-1.5	-1.44	-1.61	-1.45	-1.7	-1.8	-2.14	-1.51	-1.86	-1.52	-1.78	-1.64	-0.96	-2.27	-2.56	-1.7	-2.63	-1.84	-1.86	-1.53	2.66	2.48		2.17
hsa_miR_99a	1	0.408	-0.082	-2.742	-1.932	-0.592	0.268	-2.222	-1.482	-0.172	-1.612	0.238	-0.562	0.098	-1.392	-1.412	-1.132	-0.622	1.298	-0.752	0.848	-0.402	0.378	-0.532	-3.182	0.128	1.628	0.028	-0.832	-1.262	-0.322	-0.382	0.078	-0.152	-0.132	-1.142	-0.872	-0.152	0.728	0.388	0.018	1.328	1.028	0.548	1.638	0.888	-1.892	0.808	-0.732
[truncated: 26 more columns]
