# Supplementary material for: MicroRNA Profiling of BRCA1/2 Mutation-Carrying and Non-Mutation-Carrying High-Grade Serous Carcinomas of Ovary
Source: PLoS One. 2009 Oct 2;4(10):e7314. doi: 10.1371/journal.pone.0007314 (PMC2749450; doi:10.1371/journal.pone.0007314)
Supplement: Table S4 — Comparison of the miRNA profiling analysis results between prior studies and the current study. (0.03 MB XLS) [file pone.0007314.s004.xls]

## Sheet: Comparison
	Dahiya et al	Nam et al	Yang et al	Zhang et al	Irio et al
Ovarian carcinoma types studied	Tumor tissue + cell line (serous carcinoma predominant)	Tumor tissue (serous carcinomas only)	Tumor tissue (serous carcinoma predominant)	Tumor tissue (serous carcinoma predominant)	Tumor tissue (serous carcinoma predominant)
Normal tissue/cell used for comparison	Ovarian surface epithelial cell line	Ovarian tissue	Ovarian tissue	Ovarian surface epithelial cell line	Ovarian tissue + Ovarian surface epithelial cell line
miRNA that are upregulated in high grade serous carcinoma vs. fallopian tube
hsa_miR_200c		Upregulated			Upregulated
hsa_miR_106b	Downregulated
hsa_miR_141	Downregulated	Upregulated			Upregulated
hsa_miR_106a
hsa_miR_17_5p
hsa_miR_107
hsa_miR_20b
hsa_miR_181b
hsa_miR_146b	Upregulated
hsa_miR_103				Upregulated
hsa_miR_205					Upregulated
hsa_miR_182				Upregulated	Upregulated
hsa_miR_203
hsa_miR_20a		Upregulated
hsa_miR_15a
hsa_miR_422b
hsa_miR_21	Downregulated
hsa_miR_363		Upregulated
hsa_miR_422a	Downregulated
miRNA that are downregulated in high grade serous carcinoma vs. fallopian tube
hsa_miR_145		Downregulated		Downregulated	Downregulated
hsa_miR_143		Downregulated			Downregulated
hsa_miR_34c	Downregulated				Downregulated
hsa_miR_195	Downregulated				Downregulated
hsa_miR_29c	Upregulated				Downregulated
hsa_miR_125b		Downregulated	Downregulated		Downregulated
hsa_let_7b		Downregulated	Downregulated
hsa_miR_126					Downregulated
hsa_let_7c			Downregulated		Downregulated
