# Supplementary material for: MicroRNA Profiling of BRCA1/2 Mutation-Carrying and Non-Mutation-Carrying High-Grade Serous Carcinomas of Ovary
Source: PLoS One. 2009 Oct 2;4(10):e7314. doi: 10.1371/journal.pone.0007314 (PMC2749450; doi:10.1371/journal.pone.0007314)
Supplement: Table S5 — Summary results of p53 mutation analysis findings in high grade serous carcinomas. (0.03 MB XLS) [file pone.0007314.s005.xls]

## Sheet: mutation list
STT	VOA	Mutation	Type of mutation	mRNA location	Nucleotide change	Amino acid change	Comment
5064	336	Present	frameshift	706	delC		homozygote or LOH
5070	372	Present	frameshift	384_385	insG		heterozygote
5071	379	Present	frameshift	503_504	delCC		heterozygote
5032	163	Present	in frame deletion	734_742	delCATCTACAA		heterozygote
5062	332	Present	in frame deletion	962_967	delGTGTAA		homozygote or LOH
5053	293	Present	intronic deletion	IVS5-27 to -8	delCTCTGATTCCTCACTGATTG		heterozygote
5031	161	Present	missense	656	C>G	C135W	heterozygote
5037	201	Present	missense	691	T>A	V147D	heterozygote
5038	212	Present	missense	1068	C>T	R273C	heterozygote
5040	217	Present	missense	910	A>G	Y220C	heterozygote
5043	223	Present	missense	829	A>G	H193R	heterozygote
5052	283	Present	missense	720	G>T	V157F	heterozygote
5059	327	Present	missense	787	A>G	H197R	homozygote or LOH
5060	329	Present	missense	984	G>A	G245S	heterozygote
5061	330	Present	missense	993	C>T	R248W	heterozygote
5067	345	Present	missense	962	G>A	M237I	heterozygote
5069	366	Present	missense	646	A>G	K132R	homozygote or LOH
5036	195	Absent
5054	297	Absent
5073	388	Absent
VOA, Vancouver tumor bank number; STT, Stanford tumor bank number.
